# Supplementary material for: Reinforce the antitumor activity of CD8+ T cells via glutamine restriction
Source: PubMed Central journal article supplement — Cancer Sci. 2018 Nov 2;109(12):3737–50. doi: 10.1111/cas.13827 (PMC6272119; doi:10.1111/cas.13827), 2018-11-02
Supplement: CAS-109-3737-s001.pdf [file CAS-109-3737-s001.pdf]

## Supporting information

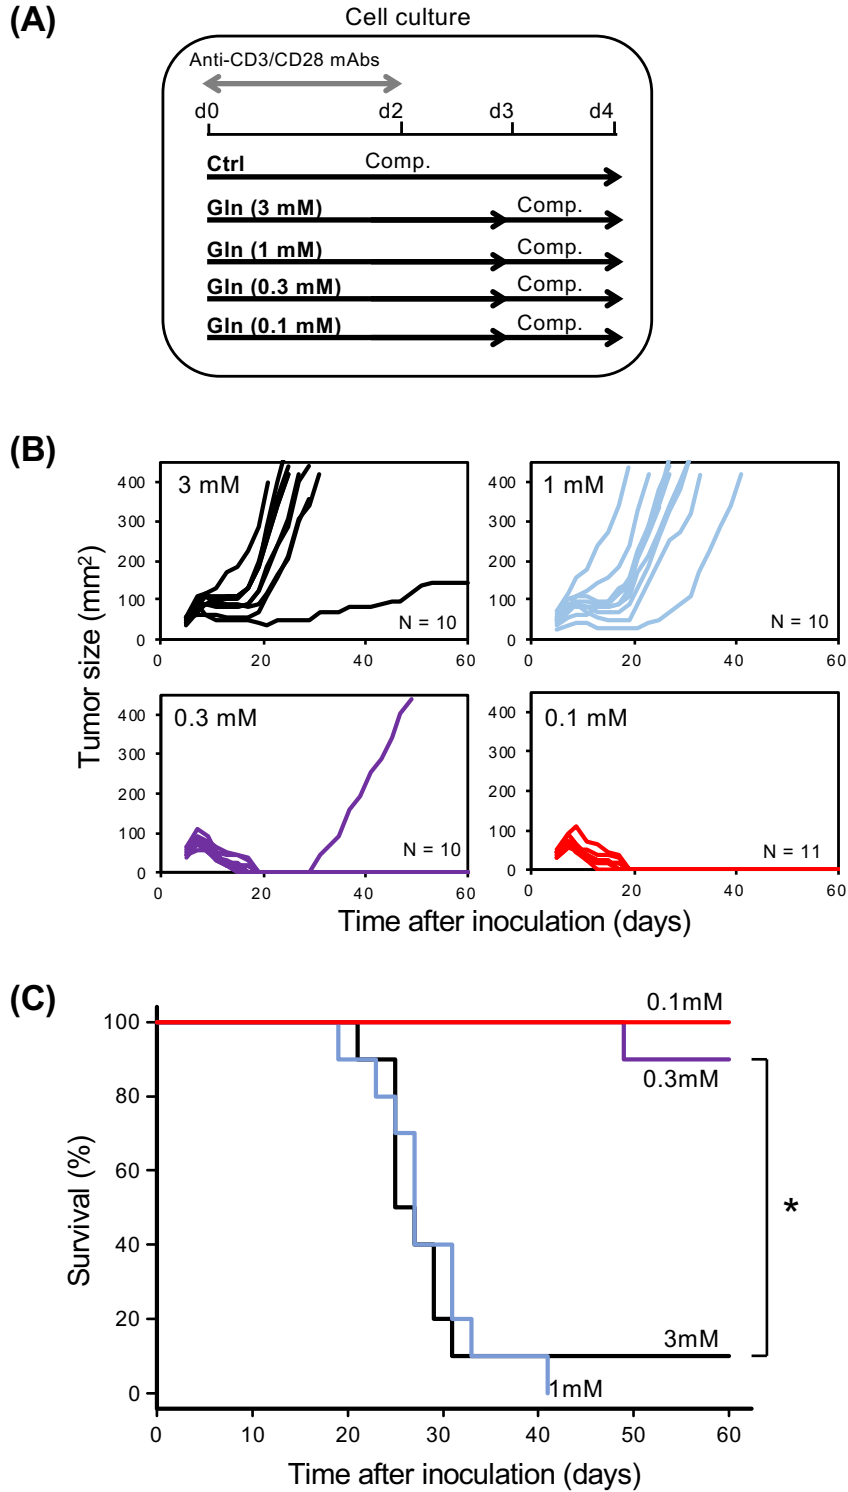

**Fig S1. Comparison of antitumor activity of CD8<sup>+</sup> T cells cultured with different doses of Gln. (A)** The protocol for OT-1 CD8<sup>+</sup> T-cell activation and culture. **(B)** Kinetics of the tumor sizes measured after tumor inoculation. **(C)** Kaplan-Meier's survival curve of tumor-inoculated mice. N = 10-11 per group, \* $p < 0.01$  (Log-rank test).

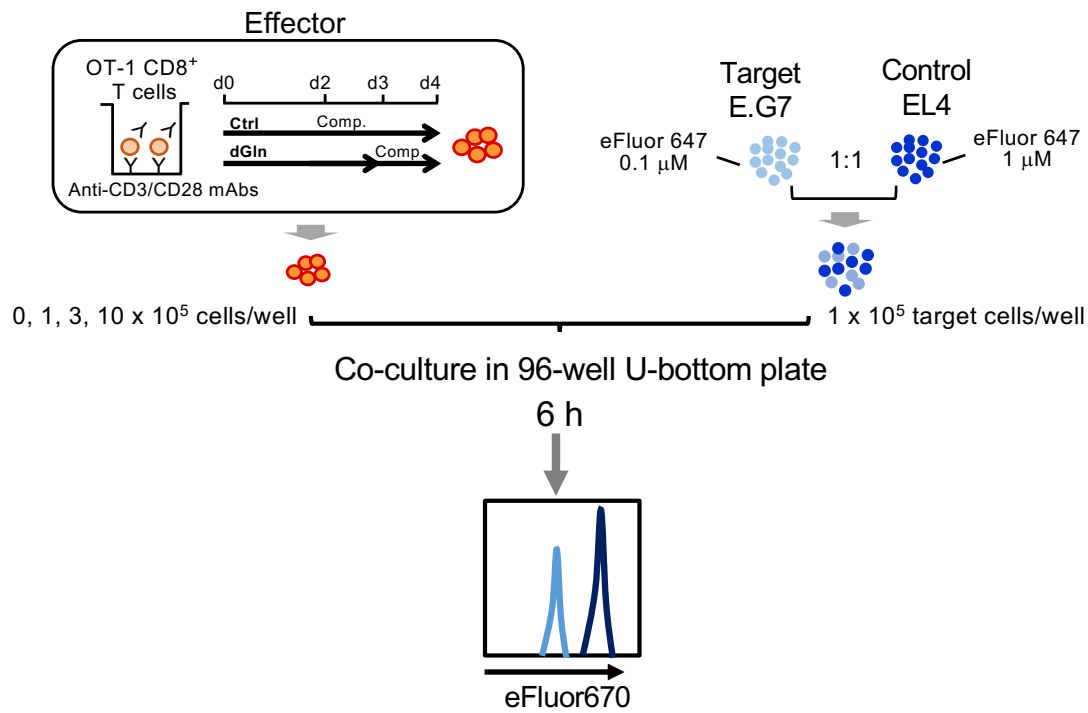

**Fig S2. Schematic outline of an *in vitro* cytotoxic assay of activated OT-1 CD8<sup>+</sup> T cells.** Tumor cells were prepared using a 1:1 mixture of target E.G7 cells and control EL4 cells labeled with different concentration of eFluor 670. The effector OT-1 CD8<sup>+</sup> T cells and tumor cells were then co-cultured in 96-well U-bottom plate for 6 h. Next, a ratio of target and control cells were analyzed by flow cytometry.

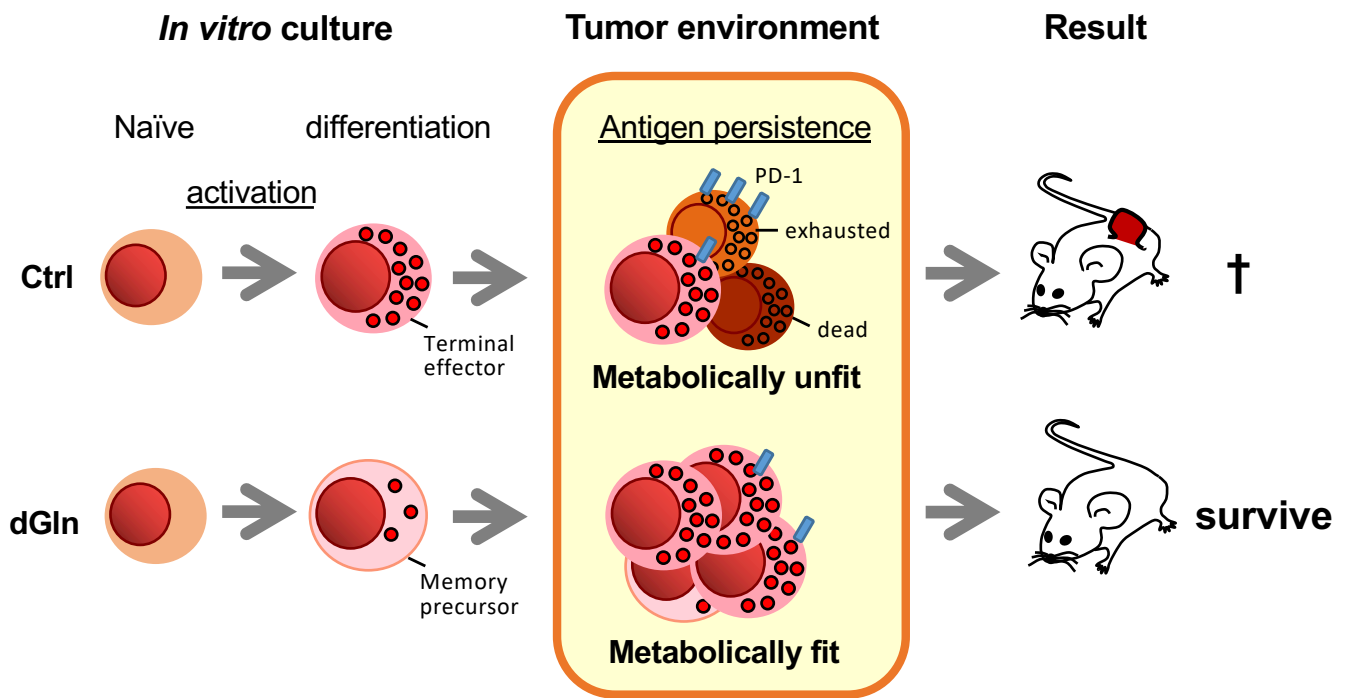

**Fig S3. A schematic model of antitumor activity of tumor-specific CD8<sup>+</sup> T cell cultured in Ctrl or dGln conditions.** dGln culture enhances differentiation into memory and antitumor activity reducing T-cell exhaustion. †, Death of mouse.
